# Supplementary material for: Combined Plasma DHA-Containing Phosphatidylcholine PCaa C38:6 and Tetradecanoyl-Carnitine as an Early Biomarker for Assessing the Mortality Risk among Sarcopenic Patients
Source: MDPI journal article supplement (doi:10.3390/nu16050611), 2024-02-23
Supplement: s1 [file s1]

# Combined plasma DHA-containing phosphatidylcholine PCaa C38:6 and tetradecanoyl-carnitine as an early biomarker for assessing the mortality risk among sarcopenic patients

Hung-Yao Ho <sup>1,2,3,4</sup>, Yun-Ho Chen <sup>3</sup>, Chi-Jen Lo <sup>1,2</sup>, Hsiang-Yu Tang <sup>1</sup>, Su-Wei Chang <sup>5,6</sup>, Chun-Ming Fan <sup>1</sup>, Yu-Hsuan Ho <sup>7</sup>, Gigin Lin <sup>2,8,9</sup>, Chih-Yung Chiu <sup>2,10,11</sup>, Chih-Ming Lin <sup>12,13,14,\*</sup> and Mei-Ling Cheng <sup>1,2,7,\*</sup>

<sup>1</sup> Metabolomics Core Laboratory, Healthy Aging Research Center, Chang Gung University, Taoyuan, Taiwan; hoh01@mail.cgu.edu.tw (H.-Y. H.); chijenlo@mail.cgu.edu.tw (C.-J. L.); tangshyu@gmail.com (H.-Y.T.); jimmyf@gap.cgu.edu.tw (C.-M. F.); chengm@gap.cgu.edu.tw (M.-L.C.)

<sup>2</sup> Clinical Metabolomics Core Laboratory, Chang Gung Memorial Hospital at Linkou, Taoyuan, Taiwan; giginlin@cgmh.org.tw (G.L.); pedchestic@gmail.com (C.-Y.C.)

<sup>3</sup> Graduate Institute of Biomedical Sciences, College of Medicine, Chang Gung University, Taoyuan, Taiwan; david820524@gmail.com (Y.-H.C.)

<sup>4</sup> Department of Medical Biotechnology and Laboratory Science, College of Medicine, Chang Gung University, Taoyuan, Taiwan

<sup>5</sup> Clinical Informatics and Medical Statistics Research Center, Chang Gung University, Taoyuan, Taiwan; shwchang@mail.cgu.edu.tw (S.-W.C.)

<sup>6</sup> Department of Laboratory Medicine, Chang Gung Memorial Hospital at Linkou, Taoyuan, Taiwan

<sup>7</sup> Department of Biomedical Sciences, College of Medicine, Chang Gung University, Taoyuan, Taiwan; hokylie4@gmail.com (Y.-H.H.)

<sup>8</sup> Department of Medical Imaging and Intervention, Chang Gung Memorial Hospital at Linkou and Chang Gung University, Taoyuan, Taiwan

<sup>9</sup> Department of Medical Imaging and Radiological Sciences, Chang Gung University, Taoyuan, Taiwan

<sup>10</sup> Department of Pediatrics, Chang Gung Memorial Hospital at Linkou, and Chang Gung University, Taoyuan, Taiwan

<sup>11</sup> Department of Pediatrics, Chang Gung Memorial Hospital at Keelung, and Chang Gung University, Taoyuan, Taiwan

<sup>12</sup> Division of Internal Medicine, Chang Gung Memorial Hospital at Taipei, Taipei, Taiwan; lin789@adm.cgmh.org.tw (C.-M.L.)

<sup>13</sup> Department of Health Management, Chang Gung Health and Culture Village, Taoyuan, Taiwan

<sup>14</sup> College of Medicine, Chang Gung University, Taoyuan, Taiwan

\* Correspondence: chengm@mail.cgu.edu.tw; Tel.: +886-3-2118800 ext. 3811 (M.-L.C.); lin789@adm.cgmh.org.tw (C.-M.L.)

## Supplemental Material includes three Supplemental Tables and four Supplemental Figure

### Supplemental Tables

**Table S1.** The 5.5-year mortality of all participants.

**Table S2.** Differentially abundant metabolites in plasma of the Alive and Dead cohorts of non-sarcopenic subjects and sarcopenic patients.

**Table S3.** The mean plasma concentrations of PCaa C38:6 and C14-carnitine and the mortality of sarcopenic patients grouped on the basis of tertile concentrations and hypertension status.

### Supplemental Figures

**Figure S1.** The study flow diagram. Two hundred and thirty-four participants were enrolled in the present study, and plasma samples were collected. Of these participants, 11 cancer patients were excluded. Forty-four normal subjects, 81 non-sarcopenic LPF subjects, and 98 sarcopenic patients were categorized according to the AWGS 2019 criteria. The normal and non-sarcopenic LPF subjects were grouped as non-sarcopenic subjects. Plasma samples were subjected to metabolomic analyses. All subjects were followed up for 5.5 years. One hundred and six non-sarcopenic subjects were (group 1) alive, and 10 (group 2) deceased. Fifty-four sarcopenic patients (group 3) were alive, and 35 (group 4) died.

**Figure S2.** Global analysis of plasma metabolites in sarcopenic and non-sarcopenic patients. Plasma collected from the non-sarcopenia alive (group 1), non-sarcopenia dead (group 2), sarcopenia alive (group 3) and sarcopenia dead (group 4) patient cohorts (as defined in Figure S1) were subjected to global metabolomic analysis. A total of 3276 unique features were identified. The datasets were analyzed using PLS-DA. Fifty-three metabolites had VIP scores greater than 3. The datasets were independently analyzed using ANOVA with Tukey's HSD test. Thirty-nine differentially abundant metabolites were found ( $P < 0.05$ ). The Venn diagram shows that only 4 metabolites fit both criteria. These metabolites were identified to be the [M+H] and [M+Na] adducts of PCaa C38:6 and PCaa C40:6.

**Figure S3.** The proportion of different molecular species with formulae PCaa C38:6 and PCaa C40:6. The plasma samples were analyzed using TOF-MS/MS for identification and quantification of the molecular species with respective chemical formulae. The proportion was calculated accordingly. Data are mean  $\pm$  SD, N = 86.

**Figure S4.** The Kaplan-Meier survival curves of the non-sarcopenic (N) or sarcopenic (S) patients without (*Non-HTN*) or with hypertension (*HTN*). (A,B) All participants were categorized into N and S cohorts (A), or non-HTN and HTN cohorts (B). (C,D) All participants were categorized into non-HTN (C) or HTN (D) cohorts, each of which was further subdivided into N and S cohorts.

**Table S1.** The 5.5-year mortality of all participants.

A. The mortality of the non-sarcopenia, low physical function, and sarcopenia cohorts.

|           | Non-sarcopenia |            | Sarcopenia |
|-----------|----------------|------------|------------|
|           | Normal         | LPF        |            |
|           | N (%)          | N (%)      | N (%)      |
| Alive     | 38 (86.4%)     | 68 (84.0%) | 54 (55.1%) |
| Bedridden | 2 (4.5%)       | 7 (8.6%)   | 9 (9.2%)   |
| Dead      | 4 (9.1%)       | 6 (7.4%)   | 35 (35.7%) |

B. The mortality of the non-sarcopenia and sarcopenia cohorts.

|           | Non-sarcopenia | Sarcopenia |
|-----------|----------------|------------|
|           | N (%)          | N (%)      |
| Alive     | 106 (84.8%)    | 54 (55.1%) |
| Bedridden | 9 (7.2%)       | 9 (9.2%)   |
| Dead      | 10 (8.0%)      | 35 (35.7%) |

The normal and non-sarcopenic LPF subjects were included in the non-sarcopenia cohort.

**Table S2.** Differentially abundant metabolites in plasma of the Alive and Dead cohorts of non-sarcopenic subjects and sarcopenic patients.

| Metabolite     | Non-sarcopenia   |                  |                      | Sarcopenia       |                  |                      |
|----------------|------------------|------------------|----------------------|------------------|------------------|----------------------|
|                | Alive, N = 106   | Dead, N = 10     | P-value <sup>1</sup> | Alive, N = 54    | Dead, N = 35     | P-value <sup>1</sup> |
| C4-OH (C3-DC)  | 0.062 ± 0.027    | 0.061 ± 0.016    | 0.92290              | 0.058 ± 0.018    | 0.073 ± 0.023    | 0.0005               |
| C4             | 0.245 ± 0.129    | 0.234 ± 0.045    | 0.58703              | 0.237 ± 0.067    | 0.291 ± 0.112    | 0.0138               |
| C6 (C4:1-DC)   | 0.108 ± 0.037    | 0.110 ± 0.022    | 0.88342              | 0.114 ± 0.035    | 0.143 ± 0.057    | 0.0098               |
| C5:1-DC        | 0.014 ± 0.005    | 0.013 ± 0.001    | 0.15248              | 0.014 ± 0.006    | 0.017 ± 0.008    | 0.0407               |
| C5-DC (C6-OH)  | 0.033 ± 0.013    | 0.032 ± 0.005    | 0.42598              | 0.032 ± 0.009    | 0.043 ± 0.018    | 0.0036               |
| C9             | 0.029 ± 0.013    | 0.026 ± 0.005    | 0.08253              | 0.029 ± 0.009    | 0.035 ± 0.015    | 0.0240               |
| C10            | 0.331 ± 0.136    | 0.358 ± 0.110    | 0.54943              | 0.355 ± 0.127    | 0.425 ± 0.176    | 0.0457               |
| C12            | 0.115 ± 0.035    | 0.115 ± 0.024    | 0.96632              | 0.117 ± 0.027    | 0.138 ± 0.037    | 0.0045               |
| C14            | 0.035 ± 0.006    | 0.036 ± 0.003    | 0.55319              | 0.035 ± 0.006    | 0.040 ± 0.006    | 0.0002               |
| C14:1-OH       | 0.016 ± 0.004    | 0.017 ± 0.004    | 0.85965              | 0.017 ± 0.004    | 0.019 ± 0.004    | 0.0495               |
| C16-OH         | 0.007 ± 0.002    | 0.008 ± 0.001    | 0.35751              | 0.007 ± 0.001    | 0.008 ± 0.001    | 0.0129               |
| C16:1-OH       | 0.012 ± 0.002    | 0.012 ± 0.002    | 0.51024              | 0.012 ± 0.002    | 0.013 ± 0.002    | 0.0389               |
| Cit            | 39.759 ± 17.286  | 38.150 ± 10.685  | 0.77354              | 41.459 ± 11.550  | 48.817 ± 15.037  | 0.0108               |
| Ser            | 124.295 ± 20.761 | 131.260 ± 25.588 | 0.32235              | 125.533 ± 18.779 | 112.406 ± 24.929 | 0.0058               |
| Trp            | 57.322 ± 11.552  | 56.840 ± 11.690  | 0.90000              | 59.626 ± 10.479  | 54.169 ± 12.278  | 0.0275               |
| Creatinine     | 97.242 ± 81.763  | 93.480 ± 29.455  | 0.76109              | 96.309 ± 32.105  | 130.029 ± 63.307 | 0.0055               |
| Kynurenine     | 2.382 ± 0.664    | 2.558 ± 0.596    | 0.41974              | 2.508 ± 0.700    | 2.863 ± 0.926    | 0.0426               |
| SDMA           | 0.760 ± 0.417    | 0.799 ± 0.180    | 0.58665              | 0.789 ± 0.257    | 1.120 ± 0.538    | 0.0014               |
| lysoPC a C18:0 | 41.400 ± 8.852   | 34.660 ± 10.318  | 0.02511              | 41.648 ± 9.090   | 35.900 ± 10.939  | 0.0086               |
| lysoPC a C24:0 | 0.247 ± 0.050    | 0.222 ± 0.037    | 0.11862              | 0.248 ± 0.050    | 0.225 ± 0.051    | 0.0375               |
| lysoPC a C26:0 | 0.177 ± 0.043    | 0.170 ± 0.034    | 0.60279              | 0.168 ± 0.031    | 0.153 ± 0.026    | 0.0225               |
| PC aa C36:1    | 32.679 ± 7.843   | 34.680 ± 12.815  | 0.63836              | 31.363 ± 7.949   | 27.626 ± 9.479   | 0.0478               |
| PC aa C36:2    | 198.002 ± 29.423 | 189.500 ± 34.342 | 0.39090              | 195.074 ± 28.864 | 176.314 ± 33.369 | 0.0060               |
| PC aa C38:0    | 3.540 ± 0.946    | 3.834 ± 1.437    | 0.54020              | 3.685 ± 1.187    | 3.054 ± 1.128    | 0.0145               |
| PC aa C38:4    | 85.992 ± 24.350  | 77.660 ± 23.016  | 0.30109              | 84.470 ± 22.484  | 73.114 ± 20.429  | 0.0180               |
| PC aa C38:5    | 40.739 ± 10.736  | 39.050 ± 17.050  | 0.76497              | 40.076 ± 11.407  | 33.763 ± 10.186  | 0.0094               |
| PC aa C38:6    | 88.734 ± 23.968  | 92.170 ± 32.817  | 0.67591              | 85.576 ± 22.647  | 66.229 ± 20.437  | 0.0001               |
| PC aa C40:5    | 8.330 ± 2.259    | 7.642 ± 2.570    | 0.36478              | 7.757 ± 1.902    | 6.541 ± 1.826    | 0.0036               |
| PC aa C40:6    | 32.839 ± 9.150   | 33.620 ± 14.030  | 0.86645              | 30.774 ± 7.525   | 23.278 ± 7.337   | 0.0000               |
| PC ae C30:2    | 0.067 ± 0.015    | 0.069 ± 0.020    | 0.67346              | 0.064 ± 0.014    | 0.057 ± 0.013    | 0.0195               |
| PC ae C36:2    | 10.045 ± 2.263   | 10.753 ± 2.907   | 0.35802              | 10.234 ± 2.190   | 9.083 ± 1.862    | 0.0120               |
| PC ae C38:0    | 1.754 ± 0.678    | 1.732 ± 0.728    | 0.92300              | 1.688 ± 0.540    | 1.298 ± 0.530    | 0.0012               |
| PC ae C38:2    | 0.740 ± 0.301    | 0.814 ± 0.485    | 0.64638              | 0.811 ± 0.364    | 0.667 ± 0.237    | 0.0266               |
| PC ae C38:6    | 6.680 ± 1.822    | 6.648 ± 2.264    | 0.95863              | 6.764 ± 2.319    | 5.778 ± 2.123    | 0.0461               |
| PC ae C40:1    | 1.030 ± 0.280    | 0.986 ± 0.294    | 0.63165              | 1.073 ± 0.283    | 0.833 ± 0.246    | 0.0001               |

|               |                 |                 |         |                 |                 |        |
|---------------|-----------------|-----------------|---------|-----------------|-----------------|--------|
| PC ae C40:6   | 4.171 ± 0.948   | 4.393 ± 1.087   | 0.48517 | 4.271 ± 1.092   | 3.681 ± 1.074   | 0.0142 |
| PC ae C42:0   | 0.786 ± 0.164   | 0.819 ± 0.129   | 0.54065 | 0.813 ± 0.152   | 0.735 ± 0.164   | 0.0241 |
| PC ae C42:1   | 0.356 ± 0.080   | 0.369 ± 0.063   | 0.62498 | 0.372 ± 0.087   | 0.322 ± 0.067   | 0.0047 |
| PC ae C42:2   | 0.489 ± 0.117   | 0.480 ± 0.122   | 0.83062 | 0.502 ± 0.127   | 0.437 ± 0.120   | 0.0168 |
| PC ae C42:3   | 0.738 ± 0.175   | 0.815 ± 0.192   | 0.19066 | 0.781 ± 0.194   | 0.697 ± 0.184   | 0.0457 |
| SM (OH) C22:1 | 49.325 ± 10.752 | 51.520 ± 13.016 | 0.54557 | 49.841 ± 9.998  | 41.783 ± 8.431  | 0.0002 |
| SM (OH) C22:2 | 52.066 ± 12.564 | 55.070 ± 11.672 | 0.46890 | 52.750 ± 9.190  | 44.994 ± 10.906 | 0.0005 |
| SM (OH) C24:1 | 2.364 ± 0.541   | 2.737 ± 0.580   | 0.04051 | 2.365 ± 0.495   | 2.131 ± 0.414   | 0.0227 |
| SM C16:1      | 31.457 ± 6.015  | 32.740 ± 7.399  | 0.52843 | 32.228 ± 6.778  | 28.869 ± 7.027  | 0.0269 |
| SM C18:1      | 22.880 ± 5.132  | 22.550 ± 5.268  | 0.84645 | 21.754 ± 4.441  | 19.175 ± 5.373  | 0.0158 |
| SM C24:0      | 51.067 ± 11.017 | 55.360 ± 13.876 | 0.25190 | 51.783 ± 10.796 | 45.971 ± 10.365 | 0.0136 |

Values are mean ± SD. <sup>1</sup>Alive vs. Dead cohorts of the same subject cohort. C4-OH (C3-DC): hydroxybutyrylcarnitine (malonylcarnitine); C4: butyrylcarnitine; C6 (C4:1-DC): hexanoylcarnitine (fumarylcarnitine); C5:1-DC: glutaconylcarnitine; C5-DC (C6-OH): glutaryl carnitine (hydroxyhexanoylcarnitine); C9: nonaylcarnitine; C10: decanoylcarnitine; C12: dodecanoylcarnitine; C14: tetradecanoylcarnitine; C14:1-OH: hydroxytetradecenoylcarnitine; C16-OH: hydroxyhexadecanoylcarnitine; C16:1-OH: hydroxyhexadecenoylcarnitine; Cit: citrulline; Ser: serine; Trp: tryptophan; SDMA: symmetric dimethylarginine; LysoPCa: lysophosphatidylcholine (acyl; a fatty acid is linked via an ester bond); PCaa: phosphatidylcholine (diacyl; both fatty acids are linked via ester bonds); PCae: phosphatidylcholine (a fatty acid is linked via an ester bond, while another is linked via an ether bond); SM: sphingomyelin; SM (OH): hydroxysphingomyelin.

**Table S3.** The mean plasma concentrations of PCaa C38:6 and C14-carnitine and the mortality of sarcopenic patients grouped on the basis of tertile concentrations and hypertension status.

A. Mean plasma PCaa C38:6 concentrations of the low (L), mid (M), high (H) tertile groups of sarcopenic patients.

| Tertile group* | Sarcopenia, N = 89 | Non-HTN, N = 43    | HTN, N = 46        | Non-HTN vs HTN |
|----------------|--------------------|--------------------|--------------------|----------------|
| PCaa C38:6     | Mean $\pm$ SD      | Mean $\pm$ SD      | Mean $\pm$ SD      | P-value        |
| L              | 53.92 $\pm$ 8.13   | 53.44 $\pm$ 9.35   | 54.44 $\pm$ 6.89   | 0.748          |
| M              | 75.48 $\pm$ 4.88   | 75.52 $\pm$ 4.68   | 75.45 $\pm$ 5.17   | 0.973          |
| H              | 103.70 $\pm$ 18.55 | 107.29 $\pm$ 22.05 | 100.11 $\pm$ 14.10 | 0.297          |

B. The mortality of all, non-HTN and HTN individuals within the low (L), mid (M), high (H) PCaa C38:6 tertile groups of sarcopenic patients.

| Tertile group* | Sarcopenia, N = 89 | Non-HTN, N = 43 | HTN, N = 46 | Non-HTN vs HTN |
|----------------|--------------------|-----------------|-------------|----------------|
| PCaa C38:6     | Dead, N (%)        | Dead, N (%)     | Dead, N (%) | P-value        |
| L (N = 29)     | 20 (68.97%)        | 11 (37.93%)     | 9 (31.03%)  | 0.614          |
| M (N = 30)     | 12 (40%)           | 1 (3.33%)       | 11 (36.66%) | 0.001          |
| H (N = 30)     | 3 (10%)            | 0 (0%)          | 3 (25%)     | 0.072          |

C. Mean plasma C14-carnitine concentrations of the low (L), mid (M), high (H) tertile groups of sarcopenic patients.

| Tertile group* | Sarcopenia, N = 89 | Non-HTN, N = 43  | HTN, N = 46      | Non-HTN vs HTN |
|----------------|--------------------|------------------|------------------|----------------|
| C14, nM        | Mean $\pm$ SD      | Mean $\pm$ SD    | Mean $\pm$ SD    | P-value        |
| L              | 30.37 $\pm$ 2.36   | 29.93 $\pm$ 1.94 | 30.75 $\pm$ 2.67 | 0.35           |
| M              | 36.35 $\pm$ 1.52   | 35.77 $\pm$ 1.24 | 36.92 $\pm$ 1.61 | 0.051          |
| H              | 43.82 $\pm$ 4.90   | 41.75 $\pm$ 4.99 | 45.76 $\pm$ 4.05 | 0.016          |

D. The mortality of all, non-HTN and HTN individuals within the low (L), mid (M), high (H) C14-carnitine tertile groups of sarcopenic patients.

| Tertile group* | Sarcopenia, N = 89 | Non-HTN, N = 43 | HTN, N = 46 | Non-HTN vs HTN |
|----------------|--------------------|-----------------|-------------|----------------|
| C14, nM        | Dead, N (%)        | Dead, N (%)     | Dead, N (%) | P-value        |
| L (N = 30)     | 5 (16.67%)         | 0 (0%)          | 5 (16.67%)  | 0.045          |
| M (N = 26)     | 12 (46.15%)        | 4 (15.38%)      | 8 (30.77%)  | 0.238          |
| H (N = 33)     | 18 (54.54%)        | 8 (24.24%)      | 10 (30.30%) | 0.732          |

\*The tertile groups were defined on the basis of concentrations of PCaa C38:6 or C14-carnitine in plasma of sarcopenic patients.

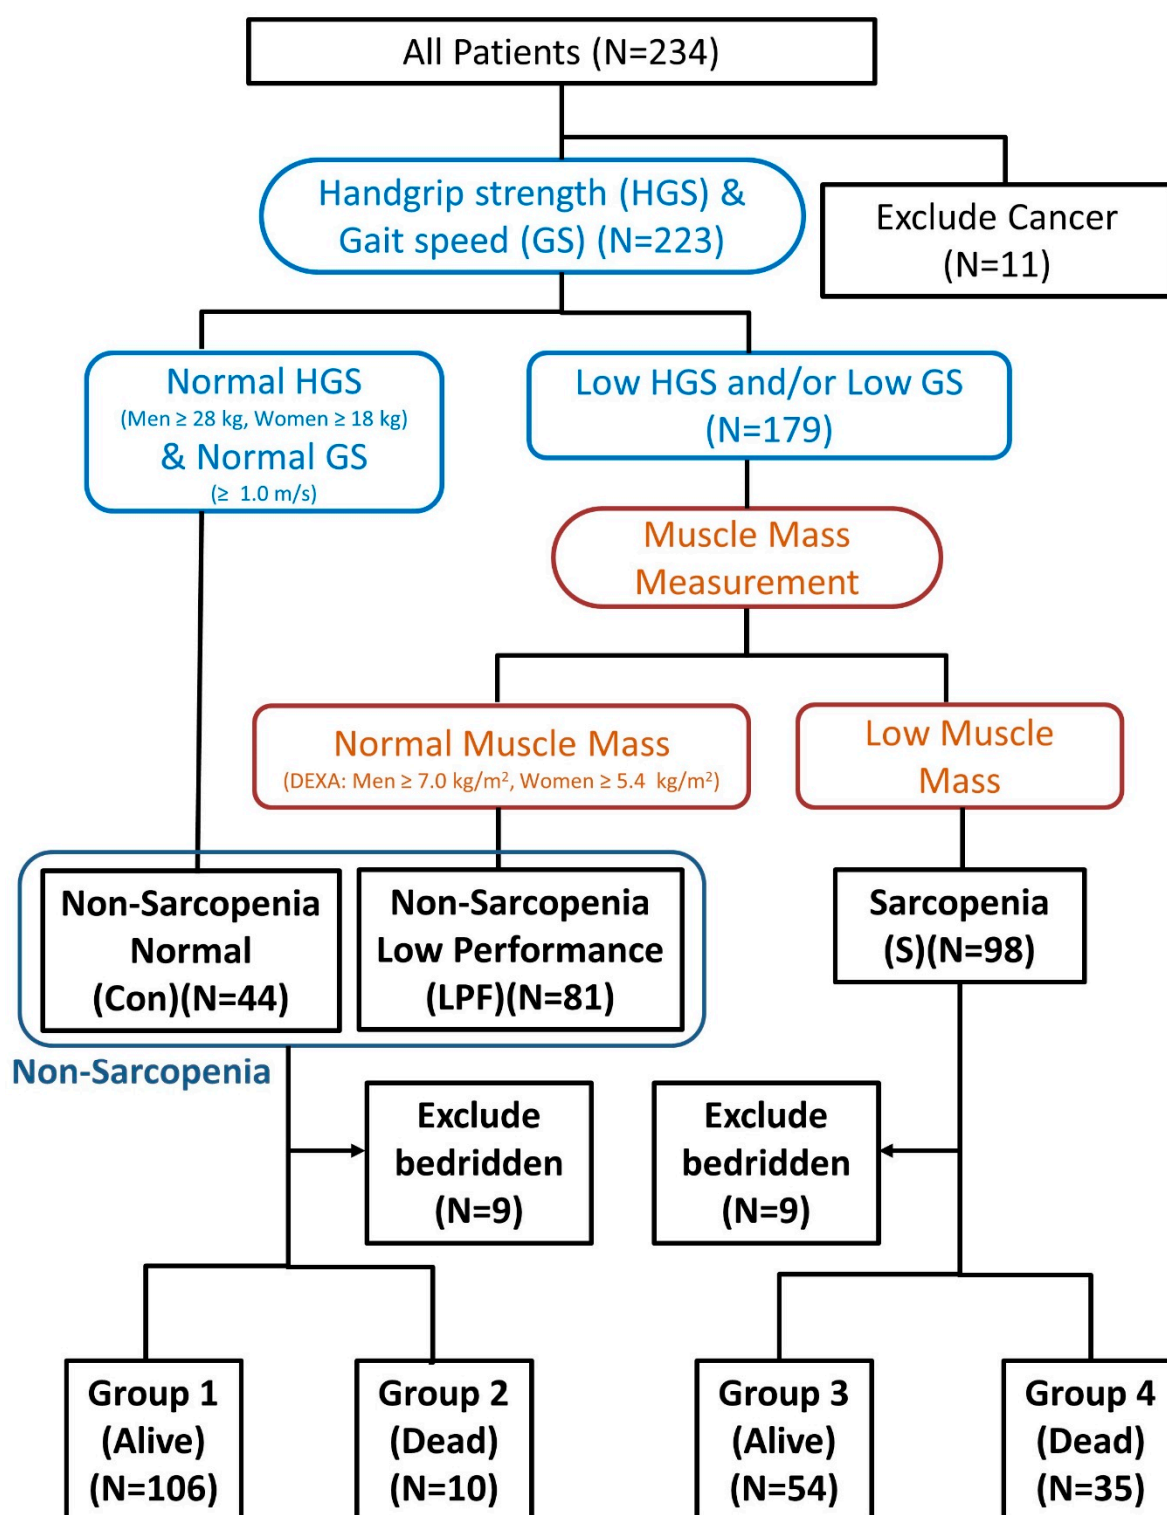

**Figure S1.** The study flow diagram. Two hundred and thirty-four participants were enrolled in the present study, and plasma samples were collected. Of these participants, 11 cancer patients were excluded. Forty-four normal subjects, 81 non-sarcopenic LPF subjects, and 98 sarcopenic patients were categorized according to the AWGS 2019 criteria. The normal and non-sarcopenic LPF subjects were grouped as non-sarcopenic subjects. Plasma samples were subjected to metabolomic analyses. All subjects were followed up for 5.5 years. One hundred and six non-sarcopenic subjects were (group 1) alive, and 10 (group 2) deceased. Fifty-four sarcopenic patients (group 3) were alive, and 35 (group 4) died.

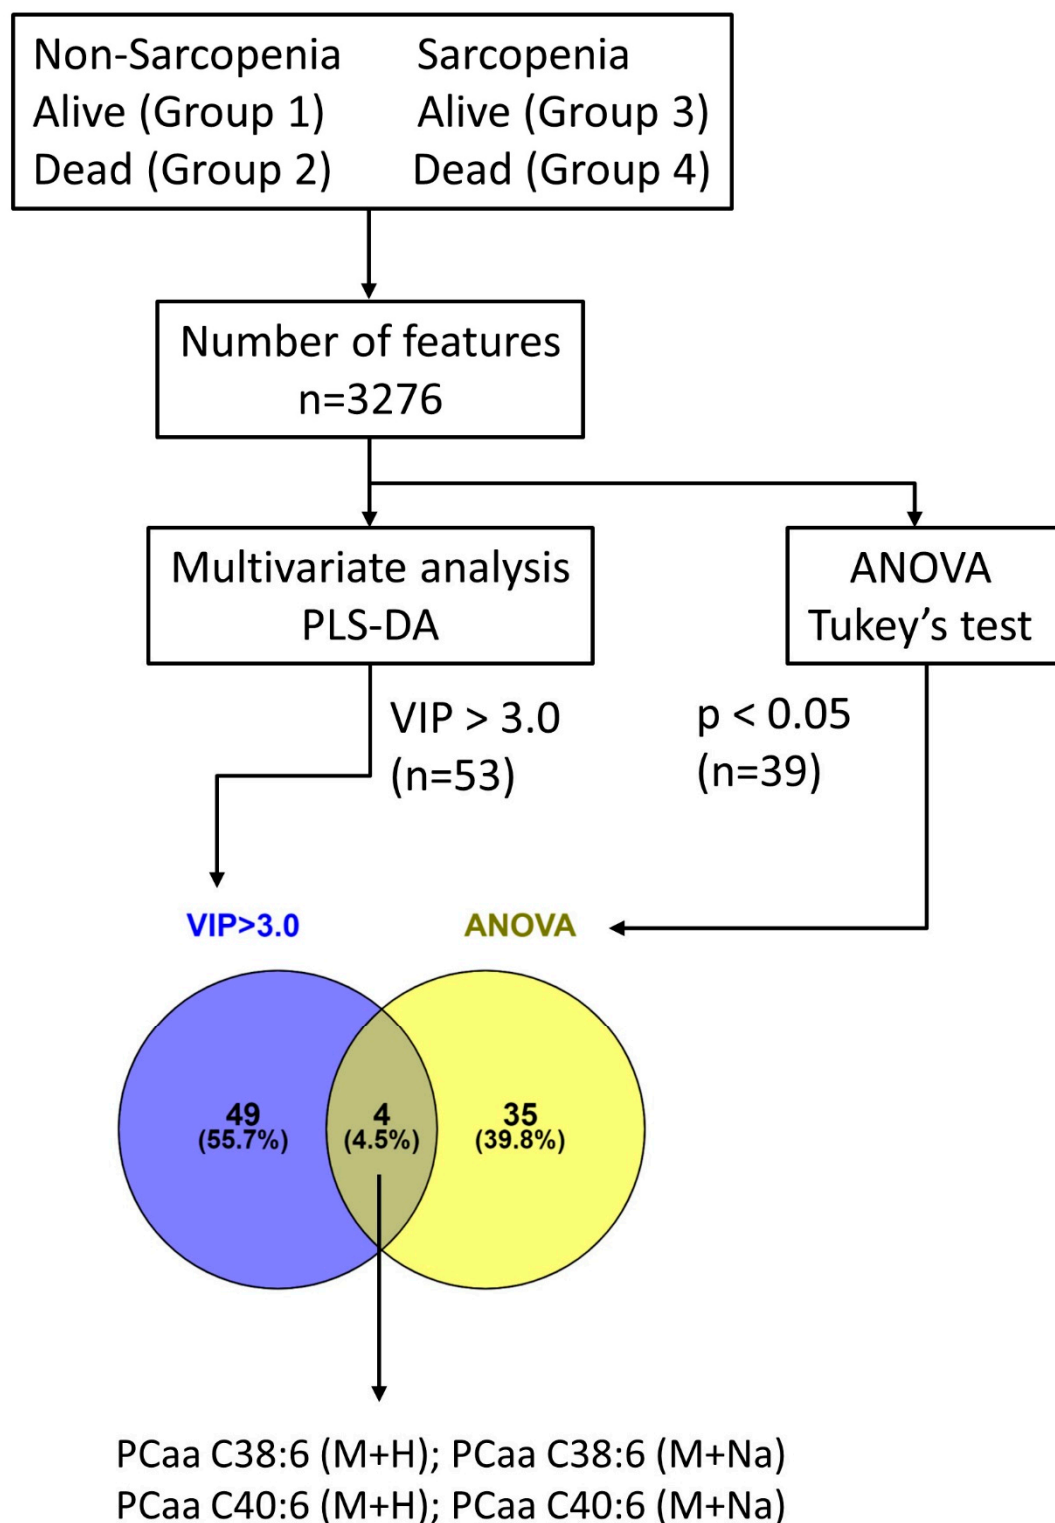

**Figure S2.** Global analysis of plasma metabolites in sarcopenic and non-sarcopenic patients. Plasma collected from the non-sarcopenia alive (group 1), non-sarcopenia dead (group 2), sarcopenia alive (group 3) and sarcopenia dead (group 4) patient cohorts (as defined in Figure S1) were subjected to global metabolomic analysis. A total of 3276 unique features were identified. The datasets were analyzed using PLS-DA. Fifty-three metabolites had VIP scores greater than 3. The datasets were independently analyzed using ANOVA with Tukey's HSD test. Thirty-nine differentially abundant metabolites were found ( $P < 0.05$ ). The Venn diagram shows that only 4 metabolites fit both criteria. These metabolites were identified to be the [M+H] and [M+Na] adducts of PCaa C38:6 and PCaa C40:6.



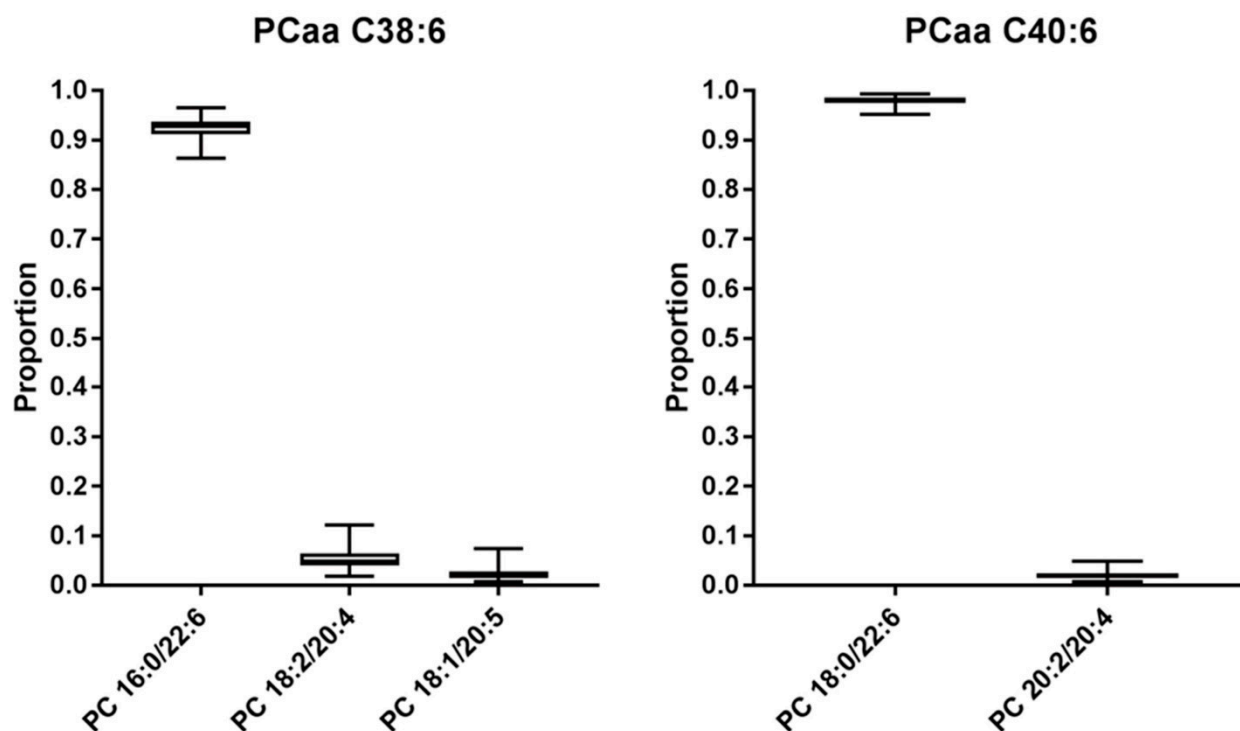

**Figure S3.** The proportion of different molecular species with formulae PCaa C38:6 and PCaa C40:6. The plasma samples were analyzed using TOF-MS/MS for identification and quantification of the molecular species with respective chemical formulae. The proportion was calculated accordingly. Data are mean  $\pm$  SD, N = 86.

# Kaplan-Meier Survival Analysis

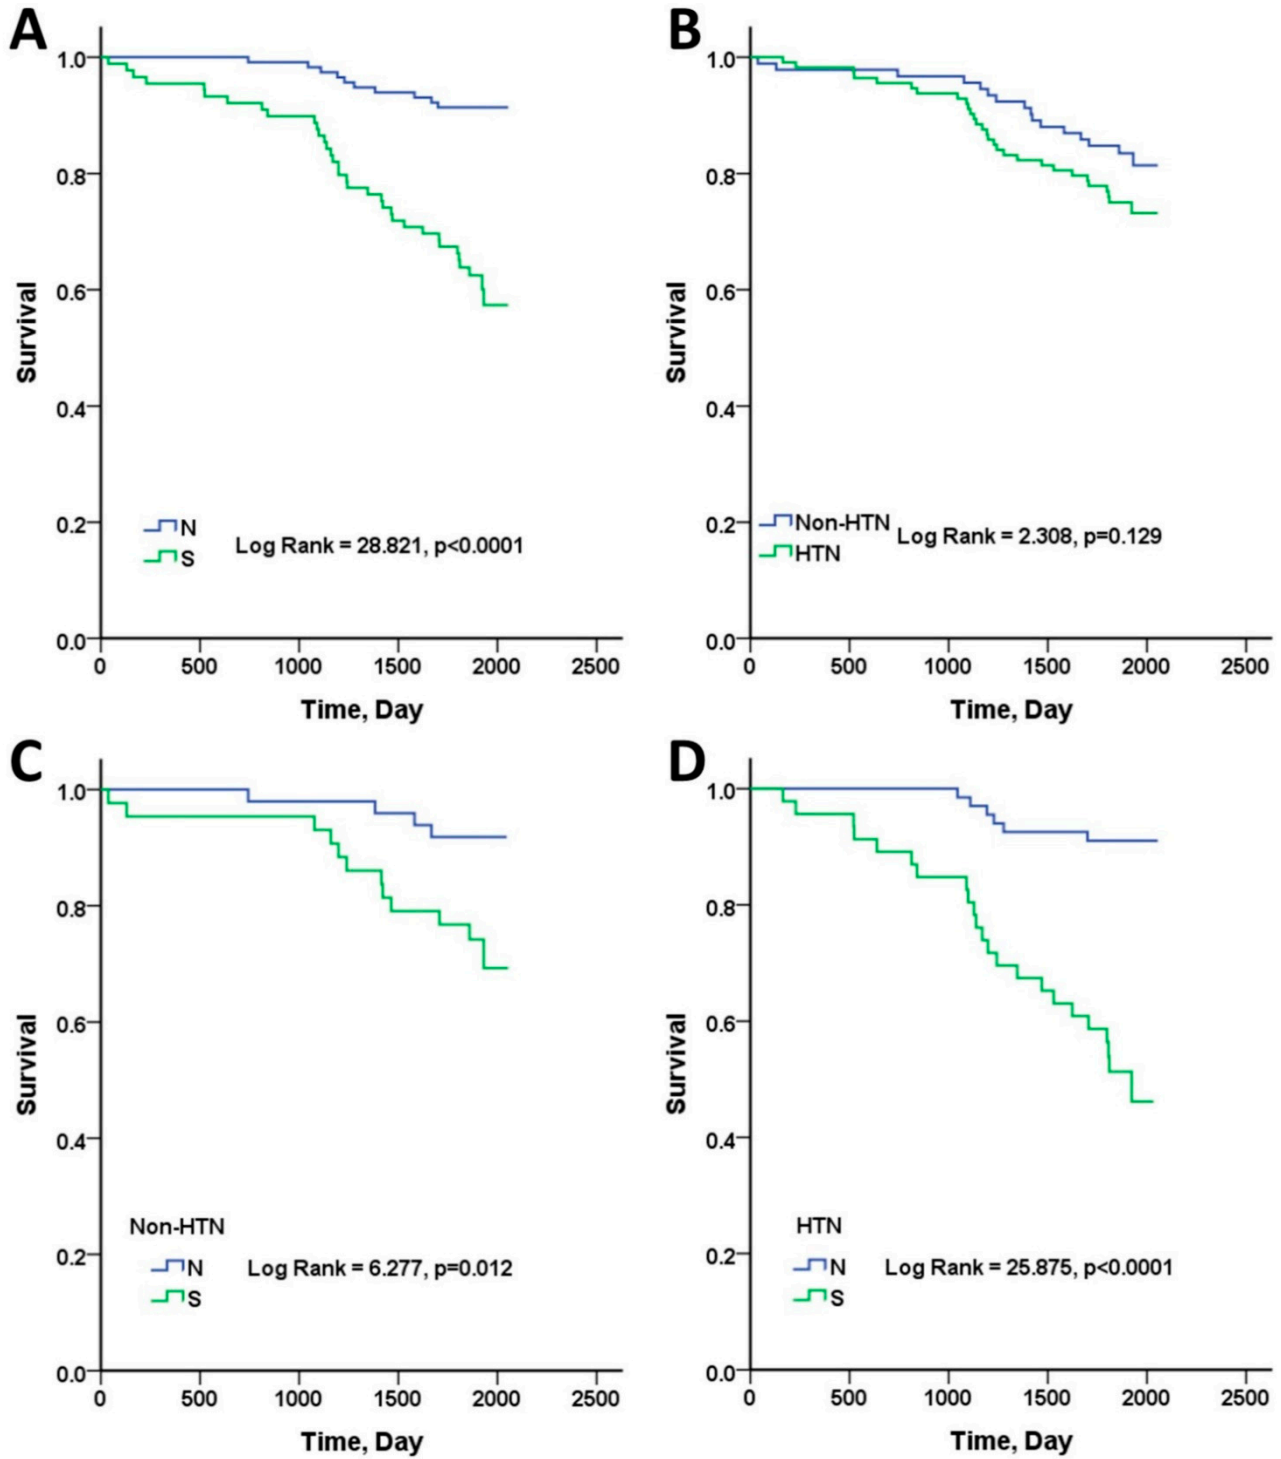

**Figure S4.** The Kaplan-Meier survival curves of the non-sarcopenic (N) or sarcopenic (S) patients without (*Non-HTN*) or with hypertension (*HTN*). (A,B) All participants were categorized into N and S cohorts (A), or non-HTN and HTN cohorts (B). (C,D) All participants were categorized into non-HTN (C) or HTN (D) cohorts, each of which was further subdivided into N and S cohorts.
